# Supplementary material
Source: Elsevier journal article supplement (https://www.sciencedirect.com/science/article/pii/S1695403320300199)
Supplement: mmc1 [file S1695403320300199:mmc1.pdf]

**35.-Generalmente prefieres las bebidas ENERGÉTICAS...**

Sin azúcar ☐ Con azúcar ☐

**36.-En el último AÑO, ¿tus padres han tomado bebidas ENERGÉTICAS en alguna ocasión?**

☐ Nunca ☐ alguna vez ☐ Muchas veces ☐ No lo sé

**37.- En el último AÑO, generalmente has practicado ejercicio físico o participado en actividades deportivas (por ejemplo ir en bicicleta, footing, natación, fútbol, basquet, patinaje, baile, tenis...) aproximadamente cada.....**

|                          |                          |                          |                          |                          |                          |
|--------------------------|--------------------------|--------------------------|--------------------------|--------------------------|--------------------------|
| <input type="checkbox"/> |
| Nunca                    | Raramente                | Una vez a la semana      | 2 veces a la semana      | 3-4 veces a la semana    | Cada día                 |

38.- En un MES cualquiera del último AÑO, ¿cuántas latas de bebidas ENERGÉTICAS has tomado en una única sesión de deporte/ejercicio físico?

☐ Ninguna      ☐ Sólo 1 lata      ☐ 2 latas      ☐ 3 latas      ☐ 4 latas      ☐ Más de 4 (especifica el promedio)   latas

**Si has contestado "Ninguna", no contestes las preguntas 39 a 41**

| 39.- Generalmente, si tomas bebidas ENERGÉTICAS antes/durante/después de practicar algún deporte,<br>el motivo es para aumentar..... |                          | Poco de<br>acuerdo       | Estoy de<br>acuerdo      | Muy de<br>acuerdo |
|--------------------------------------------------------------------------------------------------------------------------------------|--------------------------|--------------------------|--------------------------|-------------------|
| 39.a- El tiempo de resistencia a intensidad máxima                                                                                   | <input type="checkbox"/> | <input type="checkbox"/> | <input type="checkbox"/> |                   |
| 39.b- La resistencia aeróbica                                                                                                        | <input type="checkbox"/> | <input type="checkbox"/> | <input type="checkbox"/> |                   |
| 39.c- La concentración                                                                                                               | <input type="checkbox"/> | <input type="checkbox"/> | <input type="checkbox"/> |                   |
| 39.d- La fuerza                                                                                                                      | <input type="checkbox"/> | <input type="checkbox"/> | <input type="checkbox"/> |                   |
| 39.e- Otros (especifica)                                                                                                             | <input type="checkbox"/> | <input type="checkbox"/> | <input type="checkbox"/> |                   |

**40.- En el último AÑO, en alguna ocasión, ¿has tomado bebidas ENERGÉTICAS y alcohol a la vez? (puedes contestar a más de una respuesta)**

- Sí, mezclado en el momento del consumo en el mismo vaso (por ejemplo un combinado/cóctel: bebida energética y alcohol) \_\_\_\_\_ ☐

- Sí, bebidas energéticas alcohólicas premezcladas (por ejemplo, lata/botella preparada para tomar con alcohol) \_\_\_\_\_ ☐

- Sí, pero tomadas en momentos diferentes (por ejemplo, consumo de alcohol antes/después del consumo de una bebida energética) \_\_\_\_\_ ☐

- No, nunca \_\_\_\_\_ ☐

**41.- En un MES cualquiera, en el último AÑO, has tomado bebidas ENERGÉTICAS y alcohol mezclados o consumidos en momentos diferentes, pero en una misma sesión, aproximadamente cada.....**

|                          |                          |                          |                          |                          |                          |
|--------------------------|--------------------------|--------------------------|--------------------------|--------------------------|--------------------------|
| Nunca                    | Una vez al mes           | Una vez a la semana      | 2-3 días a la semana     | 4-5 días a la semana     | Cada día                 |
| <input type="checkbox"/> |

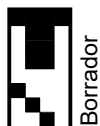

**Cuestionario de consumo de bebidas para  
alumnos de 2º ESO a 2º de Bachillerato**

Escuela    / 
 Curso   / 
 Aula  / 
 Alumno

---

1.- Año de nacimiento

Sexo ☐ Masculino ☐ Femenino

2.- Nivel educativo ☐ ESO ☐ Bachillerato

Peso (xxx,x Kg)    ,

Altura (1,xx metros)   ,

|                                                                                                                                                                                                                                                                                                                                                                                                                                                                                                                                                                                                                                                                                                             |                                                                                                                                                                                                                                                                                                                                                                                                                                                                                                                                                                                                                                                                                                                   |
|-------------------------------------------------------------------------------------------------------------------------------------------------------------------------------------------------------------------------------------------------------------------------------------------------------------------------------------------------------------------------------------------------------------------------------------------------------------------------------------------------------------------------------------------------------------------------------------------------------------------------------------------------------------------------------------------------------------|-------------------------------------------------------------------------------------------------------------------------------------------------------------------------------------------------------------------------------------------------------------------------------------------------------------------------------------------------------------------------------------------------------------------------------------------------------------------------------------------------------------------------------------------------------------------------------------------------------------------------------------------------------------------------------------------------------------------|
| <p><b>4.-País de procedencia del padre</b></p> <table border="1" style="width: 100%; height: 30px; border-collapse: collapse;"></table><br><p><b>6.-Profesión del padre</b></p> <table border="1" style="width: 100%; height: 30px; border-collapse: collapse;"></table><br><p><b>8.-Actualmente tu padre...</b></p> <div style="display: flex; justify-content: space-around;"> <span><input type="checkbox"/> Está en el paro</span> <span><input type="checkbox"/> Está trabajando</span> <span><input type="checkbox"/> Otra situación</span> </div> <p><b>10.- Especifica la otra situación del padre</b></p> <table border="1" style="width: 100%; height: 30px; border-collapse: collapse;"></table> | <p><b>5.-País de procedencia de la madre</b></p> <table border="1" style="width: 100%; height: 30px; border-collapse: collapse;"></table><br><p><b>7.-Profesión de la madre</b></p> <table border="1" style="width: 100%; height: 30px; border-collapse: collapse;"></table><br><p><b>9.-Actualmente tu madre...</b></p> <div style="display: flex; justify-content: space-around;"> <span><input type="checkbox"/> Está en el paro</span> <span><input type="checkbox"/> Está trabajando</span> <span><input type="checkbox"/> Otra situación</span> </div> <p><b>11.- Especifica la otra situación de la madre</b></p> <table border="1" style="width: 100%; height: 30px; border-collapse: collapse;"></table> |
|-------------------------------------------------------------------------------------------------------------------------------------------------------------------------------------------------------------------------------------------------------------------------------------------------------------------------------------------------------------------------------------------------------------------------------------------------------------------------------------------------------------------------------------------------------------------------------------------------------------------------------------------------------------------------------------------------------------|-------------------------------------------------------------------------------------------------------------------------------------------------------------------------------------------------------------------------------------------------------------------------------------------------------------------------------------------------------------------------------------------------------------------------------------------------------------------------------------------------------------------------------------------------------------------------------------------------------------------------------------------------------------------------------------------------------------------|

12.-En un DIA cualquiera, ¿cuántas horas duermes cada noche?

|  |  |
|--|--|
|  |  |
|--|--|

 Horas

13.- ¿Fumas? ☐ No fumo ☐ Sólo a veces ☐ Los fines de semana ☐ Cada día

14.-En un DIA cualquiera, ¿cuánto rato miras la televisión?

|                          |                          |                          |                          |                          |                          |
|--------------------------|--------------------------|--------------------------|--------------------------|--------------------------|--------------------------|
| <input type="checkbox"/> |
| Nunca                    | A veces                  | Menos de una hora        | Entre 1 y 3 horas        | Entre 3 y 5 horas        | Más de 5 horas           |

15.-En un DIA cualquiera, ¿cuánto rato juegas a videojuegos o utilizas la tablet, ordenador el móvil?

|                          |                          |                          |                          |                          |                          |
|--------------------------|--------------------------|--------------------------|--------------------------|--------------------------|--------------------------|
| <input type="checkbox"/> |
| Nunca                    | A veces                  | Menos de una hora        | Entre 1 y 3 horas        | Entre 3 y 5 horas        | Más de 5 horas           |

15.b- ¿Tienes alguna asignatura pendiente del curso pasado?

|                                  |                            |                            |                            |                                  |
|----------------------------------|----------------------------|----------------------------|----------------------------|----------------------------------|
| <input type="checkbox"/> Ninguna | <input type="checkbox"/> 1 | <input type="checkbox"/> 2 | <input type="checkbox"/> 4 | <input type="checkbox"/> 4 o más |
|----------------------------------|----------------------------|----------------------------|----------------------------|----------------------------------|

| ¿En qué momentos tomas estas bebidas?                               | Nunca                    | Durante el día           | En las comidas           | Durante el deporte       | En el tiempo de ocio     |
|---------------------------------------------------------------------|--------------------------|--------------------------|--------------------------|--------------------------|--------------------------|
| 16.- Agua _____                                                     | <input type="checkbox"/> |
| 17.- Bebidas refrescantes (Ej: Coca Cola, Fanta, Trina, _____)      | <input type="checkbox"/> |
| 18.- Zumos de fruta, batidos de bebidas comerciales _____           | <input type="checkbox"/> |
| 19.- Bebidas energéticas (Ej: Red Bull, Monster, Burn...) _____     | <input type="checkbox"/> |
| 20.- Bebidas deportivas (Ej: Gatorade, Powerade, Aquarius...) _____ | <input type="checkbox"/> |
| 21.- Cerveza _____                                                  | <input type="checkbox"/> |
| 22.- Vino _____                                                     | <input type="checkbox"/> |
| 23.- Bebidas alcohólicas (Vodka, Ron, Ginebra, Whisky..) _____      | <input type="checkbox"/> |
| 24.- Otras bebidas _____                                            | <input type="checkbox"/> |
| Especifica                                                          | <input type="checkbox"/> |

| a.- Bebidas refrescantes CON cafeína            | b.- Bebidas refrescantes SIN cafeína            | c.- Bebidas deportivas                          |
|-------------------------------------------------|-------------------------------------------------|-------------------------------------------------|
| <input type="checkbox"/> Nunca                  | <input type="checkbox"/> Nunca                  | <input type="checkbox"/> Nunca                  |
| <input type="checkbox"/> Una o dos veces al mes | <input type="checkbox"/> Una o dos veces al mes | <input type="checkbox"/> Una o dos veces al mes |
| <input type="checkbox"/> Una vez a la semana    | <input type="checkbox"/> Una vez a la semana    | <input type="checkbox"/> Una vez a la semana    |
| <input type="checkbox"/> 2-3 días a la semana   | <input type="checkbox"/> 2-3 días a la semana   | <input type="checkbox"/> 2-3 días a la semana   |
| <input type="checkbox"/> 4-5 días a la semana   | <input type="checkbox"/> 4-5 días a la semana   | <input type="checkbox"/> 4-5 días a la semana   |
| <input type="checkbox"/> Cada día               | <input type="checkbox"/> Cada día               | <input type="checkbox"/> Cada día               |

26- En un MES cualquiera del último año, ¿cuántas latas de bebidas REFRESCANTES con cafeina (Coca-Cola, Pepsi, Nestea), sin cafeina (Trinaranjus, Fanta...) o bebidas DEPORTIVAS (Aquarius, Powerade, Gatorade, Isostar...) has tomado?

**27.- ¿Cuál es la medida habitual de las bebidas que consumes?**

**27.a.- Bebidas refrescantes en general**

☐ Un vaso (200 ml)

☐ Una lata (350 ml)

☐ Una botella de medio litro (500 ml)

☐ Una botella de 1 litro (1.000 ml)

☐ Otras medidas (especifica ml)

**27.b.- Bebidas deportivas**

☐ Un vaso (200 ml)

☐ Una lata (350 ml)

☐ Una botella de medio litro (500 ml)

☐ Una botella de 1 litro (1.000 ml)

☐ Otras medidas (especifica ml)

☐ **Nunca**      ☐ **Sólo a veces**      ☐ **1-2 veces/mes**      ☐ **1 vez/setmana**      ☐ **2-3 días/semana**      ☐ **4-5 días/semana**      ☐ **Cada día**

 Borrador

|                                                   | Nunca                    | A veces                  | Habitualmente            |
|---------------------------------------------------|--------------------------|--------------------------|--------------------------|
| 30.a- En casa, en situación normal                | <input type="checkbox"/> | <input type="checkbox"/> | <input type="checkbox"/> |
| 30.b- En casa, con los amigos durante las fiestas | <input type="checkbox"/> | <input type="checkbox"/> | <input type="checkbox"/> |
| 30.c- En el bar o pub                             | <input type="checkbox"/> | <input type="checkbox"/> | <input type="checkbox"/> |
| 30.d- En la discoteca                             | <input type="checkbox"/> | <input type="checkbox"/> | <input type="checkbox"/> |
| 30.e- Cuando realizo deporte y ejercicio físico   | <input type="checkbox"/> | <input type="checkbox"/> | <input type="checkbox"/> |
| 30.f- Otros (especifica)                          | <input type="checkbox"/> | <input type="checkbox"/> | <input type="checkbox"/> |
|                                                   |                          |                          |                          |

[illegible]

☐ Ninguna

☐ 1 o menos a la semana

☐ De 2 a 4 latas a la semana

☐ De 5 a 10 latas a la semana

☐ De 11 a 20 latas a la semana

☐ Más de 20 llaunes a la setmana (especifica el promig)

latas

☐ Ninguna    ☐ Sólo 1 lata    ☐ 2 latas    ☐ 3 latas    ☐ 4 latas    ☐ Más de 4 (especifica el promedio)    



 latas

| 34.- ¿Porque acostumbrás a beber bebidas ENERGÉTICAS? |  | Poco de acuerdo          | Estoy de acuerdo         | Muy de acuerdo           |
|-------------------------------------------------------|--|--------------------------|--------------------------|--------------------------|
| 34.a- Necesidad de energia (en general)               |  | <input type="checkbox"/> | <input type="checkbox"/> | <input type="checkbox"/> |
| 34.b- Para mantenerme despierto                       |  | <input type="checkbox"/> | <input type="checkbox"/> | <input type="checkbox"/> |
| 34.c- Me gusta su sabor                               |  | <input type="checkbox"/> | <input type="checkbox"/> | <input type="checkbox"/> |
| 34.d- Aumenta la concentración                        |  | <input type="checkbox"/> | <input type="checkbox"/> | <input type="checkbox"/> |
| 34.e- Para tratar la resaca                           |  | <input type="checkbox"/> | <input type="checkbox"/> | <input type="checkbox"/> |
| 34.f- Para mejorar mi rendimiento                     |  | <input type="checkbox"/> | <input type="checkbox"/> | <input type="checkbox"/> |
| 34.g- Porque está de moda                             |  | <input type="checkbox"/> | <input type="checkbox"/> | <input type="checkbox"/> |
| 34.i- Otros motivos (especifica)                      |  | <input type="checkbox"/> | <input type="checkbox"/> | <input type="checkbox"/> |
